# Supplementary material for: Variants of the Transcription Factor 7-Like 2 (TCF7L2) Gene Are Associated With Type 2 Diabetes in an African-American Population Enriched for Nephropathy
Source: Oxford University Press journal article supplement (doi:10.2337/db07-0012), 2007-09-05
Supplement: db07-0012suppltables1-3.doc [file db07-0012suppltables1-3.doc]

**Supplementary Table 1 Frequencies of AIMs in African American, African, and European American populations**

| **SNP** | **Chromo-some** | **Location*** | **Major/Minor Allele** | **AA Controls MAF** | **AA Cases CAF** | **African CAF** | **EA CAF** |
| --- | --- | --- | --- | --- | --- | --- | --- |
| rs1240709 | 1 | 1,327,700 | G/A | 0.171 | 0.146 | 0.023 | 0.821 |
| rs1739897 | 1 | 75,888,650 | T/A | 0.396 | 0.396 | 0.386 | 0.526 |
| rs2814778 | 1 | 157,441,307 | G/A | 0.196 | 0.163 | 0.000 | 0.987 |
| rs6003 | 1 | 195,297,644 | G/A | 0.387 | 0.354 | 0.261 | 0.882 |
| rs2065160 | 1 | 203,057,600 | T/C | 0.418 | 0.405 | 0.523 | 0.041 |
| rs2752 | 1 | 232,580,494 | A/C | 0.247 | 0.223 | 0.159 | 0.581 |
| rs630101 | 1 | 234,839,039 | G/A | 0.175 | 0.124 | 0.000 | 0.846 |
| rs2339475 | 2 | 29,853,294 | G/A | 0.171 | 0.155 | 0.000 | 0.782 |
| rs3287 | 2 | 54,661,161 | G/A | 0.375 | 0.354 | 0.341 | 0.676 |
| rs975612 | 2 | 72,242,842 | C/A | 0.164 | 0.148 | 0.057 | 0.628 |
| rs935925 | 2 | 236,879,284 | C/A | 0.334 | 0.315 | 0.227 | 1.000 |
| rs4596126 | 3 | 13,634,898 | C/A | 0.193 | 0.179 | 0.023 | 0.756 |
| rs1039524 | 3 | 115,494,964 | G/A | 0.219 | 0.212 | 0.114 | 0.551 |
| rs3846193 | 3 | 190,150,859 | A/C | 0.296 | 0.260 | 0.136 | 0.936 |
| rs758973 | 4 | 13,148,471 | C/A | 0.229 | 0.233 | 0.068 | 0.795 |
| rs1525760 | 4 | 117,354,829 | G/A | 0.245 | 0.240 | 0.080 | 0.910 |
| rs930072 | 5 | 36,701,828 | G/A | 0.173 | 0.141 | 0.057 | 0.910 |
| rs3317 | 5 | 112,240,050 | G/A | 0.151 | 0.129 | 0.023 | 0.513 |
| rs3340 | 5 | 153,812,060 | T/C | 0.074 | 0.071 | 0.057 | 0.243 |
| rs185493 | 5 | 177,923,864 | A/G | 0.115 | 0.106 | 0.000 | 0.577 |
| rs3024354 | 6 | 6,237,429 | C/A | 0.211 | 0.159 | 0.023 | 0.846 |
| rs3734693 | 6 | 44,073,143 | G/A | 0.259 | 0.257 | 0.170 | 0.872 |
| rs455726 | 6 | 111,806,061 | G/A | 0.112 | 0.095 | 0.011 | 0.513 |
| rs1029122 | 6 | 132,291,834 | G/A | 0.117 | 0.101 | 0.000 | 0.564 |
| rs1480642 | 6 | 136,541,221 | A/G | 0.278 | 0.238 | 0.170 | 0.974 |
| rs736946 | 6 | 139,797,442 | C/A | 0.424 | 0.390 | 0.352 | 0.808 |
| rs362949 | 6 | 146,694,047 | G/A | 0.390 | 0.358 | 0.216 | 0.885 |
| rs6928254 | 6 | 158,490,963 | G/A | 0.115 | 0.113 | 0.102 | 0.000 |
| rs793979 | 6 | 164,686,566 | G/A | 0.392 | 0.371 | 0.273 | 0.872 |
| rs742813 | 6 | 169,988,320 | A/G | 0.358 | 0.361 | 0.420 | 0.013 |
| rs2763 | 7 | 556,186 | G/C | 0.155 | 0.139 | 0.216 | 0.158 |
| rs2965404 | 7 | 21,716,027 | G/A | 0.163 | 0.144 | 0.034 | 0.782 |
| rs2161 | 7 | 97,930,442 | G/A | 0.452 | 0.458 | 0.581 | 0.303 |
| rs2740574 | 7 | 99,220,032 | G/A | 0.351 | 0.328 | 0.250 | 0.987 |
| rs285 | 8 | 19,859,469 | A/G | 0.143 | 0.117 | 0.045 | 0.474 |
| rs3176921 | 8 | 67,253,933 | C/T | 0.389 | 0.390 | 0.398 | 0.868 |
| rs7845391 | 8 | 121,780,123 | C/G | 0.130 | 0.118 | 0.000 | 0.692 |
| rs913258 | 9 | 4,867,246 | G/C | 0.225 | 0.224 | 0.034 | 0.897 |
| rs2301550 | 9 | 20,344,796 | G/A | 0.291 | 0.289 | 0.102 | 0.910 |
| rs803733 | 9 | 124,872,700 | A/G | 0.154 | 0.140 | 0.034 | 0.833 |
| rs7349 | 10 | 31,857,911 | A/G | 0.180 | 0.160 | 0.000 | 0.949 |
| rs992528 | 10 | 118,152,572 | T/A | 0.231 | 0.234 | 0.091 | 0.872 |
| rs905552 | 11 | 19,052,735 | G/A | 0.150 | 0.105 | 0.000 | 0.718 |
| rs680273 | 11 | 64,296,211 | G/C | 0.227 | 0.189 | 0.058 | 0.934 |
| rs1042602 | 11 | 88,551,344 | C/A | 0.061 | 0.060 | 0.000 | 0.365 |
| rs1800498 | 11 | 112,796,798 | C/T | 0.214 | 0.198 | 0.170 | 0.553 |
| rs7957445 | 12 | 51,694,847 | A/G | 0.164 | 0.134 | 0.023 | 0.897 |
| rs4759816 | 12 | 130,021,395 | G/A | 0.333 | 0.323 | 0.273 | 0.936 |
| rs895898 | 13 | 38,125,547 | A/C | 0.253 | 0.263 | 0.148 | 0.782 |
| rs913607 | 13 | 105,708,805 | C/G | 0.232 | 0.216 | 0.091 | 0.782 |
| rs179562 | 14 | 30,294,209 | G/A | 0.293 | 0.274 | 0.148 | 0.821 |
| rs981270 | 14 | 85,249,374 | A/G | 0.311 | 0.295 | 0.182 | 0.679 |
| rs1800404 | 15 | 25,909,368 | G/A | 0.211 | 0.198 | 0.068 | 0.855 |
| rs2862 | 15 | 32,932,845 | A/G | 0.319 | 0.327 | 0.273 | 0.218 |
| rs4646 | 15 | 49,290,136 | G/T | 0.319 | 0.331 | 0.443 | 0.211 |
| rs1374092 | 15 | 70,595,482 | C/A | 0.268 | 0.248 | 0.091 | 0.923 |
| rs1557519 | 16 | 14,158,804 | G/A | 0.225 | 0.220 | 0.102 | 0.885 |
| rs7201030 | 16 | 75,081,293 | A/G | 0.183 | 0.165 | 0.023 | 0.821 |
| rs2228478 | 16 | 88,514,109 | A/G | 0.373 | 0.334 | 0.443 | 0.184 |
| rs2891 | 17 | 3,652,275 | A/G | 0.114 | 0.101 | 0.034 | 0.449 |
| rs2816 | 17 | 7,864,289 | C/T | 0.080 | 0.064 | 0.000 | 0.434 |
| rs8082034 | 17 | 51,221,574 | G/A | 0.189 | 0.139 | 0.034 | 0.731 |
| rs1941141 | 18 | 7,620,982 | G/A | 0.148 | 0.134 | 0.000 | 0.842 |
| rs4436849 | 18 | 28,809,444 | C/A | 0.353 | 0.359 | 0.216 | 0.949 |
| rs2900918 | 19 | 13,366,333 | G/A | 0.366 | 0.345 | 0.182 | 0.974 |
| rs4884 | 19 | 50,501,875 | G/A | 0.190 | 0.178 | 0.136 | 0.295 |
| rs6034866 | 20 | 17,551,728 | A/G | 0.205 | 0.207 | 0.034 | 0.962 |
| rs6062548 | 20 | 60,856,137 | G/A | 0.178 | 0.145 | 0.011 | 0.846 |
| rs2064056 | 21 | 35,516,978 | A/G | 0.150 | 0.129 | 0.000 | 0.756 |
| rs4821667 | 22 | 36,160,027 | A/C | 0.180 | 0.150 | 0.034 | 0.859 |

*NCBI Build 36.1 (March 2006). MAF: minor allele frequency; CAF: corresponding allele frequency.

Supplementary Table 2 Genotype frequencies in African American case and control groups

| **Gene** | **SNP** | **Alternative name** | **Chromo-some** | **Location*** | **Major**†**/**  **Minor alleles** | **T2DM-ESRD Cases**  **Frequency (n)** | | | **Controls**  **Frequency (n)** | | |
| --- | --- | --- | --- | --- | --- | --- | --- | --- | --- | --- | --- |
|  |  |  |  |  | **1/1** | **1/2** | **2/2** | **1/1** | **1/2** | **2/2** |
| CAPN10 | rs2975760 | UCSNP-44 | 2 | 241,179,836 | T/C | 0.931 (537) | 0.068 (39) | 0.002 (1) | 0.924 (551) | 0.076 (45) | 0 (0) |
| CAPN10 | rs3792267 | UCSNP-43 | 2 | 241,179,847 | G/A | 0.705 (401) | 0.278 (158) | 0.018 (10) | 0.719 (425) | 0.250 (148) | 0.030 (18) |
| PPARG | rs1801282 | P12A | 3 | 12,368,125 | C/G | 0.974 (562) | 0.024 (14) | 0.002 (1) | 0.960 (572) | 0.040 (24) | 0 (0) |
| TCF7L2 | rs7901695 | - | 10 | 114,744,078 | T/C | 0.229 (132) | 0.501 (289) | 0.270 (156) | 0.304 (181) | 0.482 (287) | 0.213 (127) |
| TCF7L2 | rs7903146 | - | 10 | 114,748,339 | C/T | 0.381 (220) | 0.510 (294) | 0.109 (63) | 0.545 (325) | 0.359 (214) | 0.096 (57) |
| TCF7L2 | rs7895340 | - | 10 | 114,791,515 | A/G | 0.650 (375) | 0.324 (187) | 0.026 (15) | 0.603 (359) | 0.341 (203) | 0.055 (33) |
| TCF7L2 | rs11196205 | - | 10 | 114,797,037 | C/G | 0.653 (377) | 0.321 (185) | 0.026 (15) | 0.606 (361) | 0.342 (204) | 0.052 (31) |
| TCF7L2 | rs12255372 | - | 10 | 114,798,892 | G/T | 0.454 (262) | 0.454 (262) | 0.092 (53) | 0.522 (311) | 0.394 (235) | 0.084 (50) |
| KCNJ11 | rs5219 | E23K | 11 | 17,366,148 | G/A | 0.899 (514) | 0.091 (52) | 0.010 (6) | 0.860 (505) | 0.138 (81) | 0.002 (1) |
| TCF1 | rs1800574 | A98V | 12 | 119,901,497 | C/T | 0.991 (560) | 0.009 (5) | 0 (0) | 0.991 (577) | 0.009 (5) | 0 (0) |
| HNF4A | rs4810424 | P2 promoter | 20 | 42,408,687 | C/G | 0.791 (446) | 0.124 (70) | 0.085 (48) | 0.840 (483) | 0.106 (61) | 0.054 (31) |
| HNF4A | rs1884613 | P2 promoter | 20 | 42,413,829 | C/G | 0.782 (451) | 0.203 (117) | 0.016 (9) | 0.836 (498) | 0.148 (88) | 0.017 (10) |
| HNF4A | rs2144908 | P2 promoter | 20 | 42,419,131 | G/A | 0.764 (441) | 0.217 (125) | 0.019 (11) | 0.820 (489) | 0.166 (99) | 0.013 (8) |

*NCBI Build 36.1 (March 2006). †Major allele is defined as most common allele in controls.

**Supplementary Table 3 Haplotype association analyses for HNF4A**

A. 2-SNP haplotype containing rs4810424 and rs1884613.

| **Haplotype** | **Case Frequency** | **Control Frequency** | **Hap-Score** | **P-Value** | **Empirical**  **P-Value** |
| --- | --- | --- | --- | --- | --- |
| Global | - | - | - | 0.030 | 0.025 |
| GG | 0.845 | 0.890 | -2.66 | 0.008 | 0.009 |
| CG | 0.038 | 0.019 | 2.83 | 0.005 | 0.005 |
| CC | 0.111 | 0.087 | 1.87 | 0.062 | 0.073 |

B. 3-SNP haplotype containing rs4810424, rs1884613 and rs2144908.

| **Haplotype** | **Case Frequency** | **Control Frequency** | **Hap-Score** | **P-Value** | **Empirical**  **P-Value** |
| --- | --- | --- | --- | --- | --- |
| Global | - | - | - | 0.034 | 0.038 |
| GGG | 0.832 | 0.879 | -2.73 | 0.006 | 0.007 |
| CGG | 0.037 | 0.019 | 2.60 | 0.009 | 0.015 |
| CCA | 0.110 | 0.086 | 1.96 | 0.050 | 0.054 |
